# Supplementary material for: Unexpected arterial wall and cellular inflammation in patients with rheumatoid arthritis in remission using biological therapy: a cross-sectional study
Source: PubMed Central journal article supplement (PMC4875657; doi:10.1186/s13075-016-1008-z), 2016-05-21
Supplement: 13075_2016_1008_MOESM1_ESM.pdf [file 13075_2016_1008_MOESM1_ESM.pdf]

## SUPPLEMENTAL MATERIAL

**Supplemental Table 1. Antibodies used for flow cytometry**

| <b>Surface marker</b> | <b>Color</b> | <b>Company</b> |
|-----------------------|--------------|----------------|
| CD14                  | PE-Cy7       | BD             |
| CD16                  | APC-Cy7      | BD             |
| HLA-DR                | PerCpCy5.5   | BD             |
| CD192 (CCR2)          | APC          | BD             |
| CD11C                 | APC          | BD             |
| CD18                  | APC          | BD             |

*PE indicates phycoerythrin, Cy; CyChrome, APC; allophycocyanin, HLA; human leukocyte antigen, PerCP; peridinin-chlorophyll-protein.*

**Supplemental Table 2:** Unadjusted linear regression analysis in RA subjects with TBR Max as the dependent variable

| Characteristic     | $\beta$ (95% CI)     | P value |
|--------------------|----------------------|---------|
| Age                | -0.322(-0.039-0.007) | 0.165   |
| BMI                | 0.096(0.385-0.705)   | 0.705   |
| SBP                | -0.064(-0.012-0.009) | 0.793   |
| Current<br>Smoking | 0.545(-0.066-0.519)  | 0.014   |

---

*Data are standardized coefficient ( $\beta$ ) with 95% confidence intervals (CI). BMI indicates body mass index, SBP; systolic blood pressure.*

**Supplemental Table 2: Clinical characteristics– *ex vivo* experiments**

|                                          | <b>Control<br/>(n=20)</b> | <b>RA, no anti-TNF<br/>(n=16)</b> | <b>RA, anti-TNF<br/>(n=20)</b> |
|------------------------------------------|---------------------------|-----------------------------------|--------------------------------|
| <b>Sex, male/female</b>                  | 9/11                      | 3/13                              | 7/13                           |
| <b>Age, years</b>                        | 56±10                     | 53±10                             | 54±9                           |
| <b>Body mass index, kg/m<sup>2</sup></b> | 26±4                      | 25±6                              | 26±4                           |
| <b>Smoking, yes/no</b>                   | 2/20                      | 6/16                              | 5/20                           |
| <b>SBP, mm Hg</b>                        | 131±13                    | 125±20                            | 139±20*                        |
| <b>DPB, mm Hg</b>                        | 84±10                     | 82±13                             | 84±10                          |
| <b>Total cholesterol, mmol/L</b>         | 5.5±1                     | 5.4±0.7                           | 5.0±0.9                        |
| <b>LDL cholesterol, mmol/L</b>           | 3.4±0.9                   | 3.3±0.7                           | 2.7±0.9*                       |
| <b>HDL cholesterol, mmol/L</b>           | 1.6±0.5                   | 1.7±0.4                           | 1.8±0.6                        |
| <b>Triglycerides, mmol/L</b>             | 0.8[0.7-1.1]              | 0.9[0.8-1.3]                      | 0.8[1.3]                       |
| <b>WBC, 10E9/L</b>                       | 5.5±0.7                   | 5.5±1.5                           | 5.9±1.6                        |
| - Lymfocytes                             | - 1.8±0.5                 | - 2.8±5.1                         | - 2.0±0.7                      |
| - Neutrofilis                            | - 3.0±0.7                 | - 3.2±1.4                         | - 3.2±1.1                      |
| - Monocytes                              | - 0.5±0.1                 | - 0.5±0.2                         | - 0.6±0.2                      |

*Values are n, mean ± SD or median [IQR,] for skewed data. SBP indicates systolic blood pressure, SDP; diastolic blood pressure, LDL; low density cholesterol, HDL, high density cholesterol, WBC; white blood cell count. \*P<0.05 vs all other groups.*

**Supplemental table 3: RA specific characteristics - *ex vivo* experiments**

| Characteristic                                      | RA, no anti-TNF<br>(n=16) | RA, anti-TNF<br>(n=20) | P-value |
|-----------------------------------------------------|---------------------------|------------------------|---------|
| <b>C-reactive protein, mg/L</b>                     | 1.7[1.1-4.3]              | 2.0[0.7-3.0]           | 0.789   |
| <b>ESR, mm/H</b>                                    | 8[7-18]                   | 6[2-10]                | 0.042   |
| <b>Disease activity score (DAS28)</b>               | 2.07[1.4-2.4]             | 1.80[1.3-2.2]          | 0.432   |
| <b>Anti-CCP positive (%)</b>                        | 10 (63)                   | 13 (65)                | 0.619   |
| <b>Rheumatoid factor positive (%)</b>               | 11 (69)                   | 11 (55)                | 0.462   |
| <b>Disease duration, years</b>                      | 9.1[5.3-14.0]             | 16.8[11.8-20.3]        | 0.008   |
| <b>Anti-TNF</b>                                     | n/a                       |                        | n/a     |
| - Adalimumab                                        |                           | 12                     |         |
| - Certolizumab                                      |                           | 1                      |         |
| - Etanercept                                        |                           | 7                      |         |
| <b>Disease duration until start anti-TNF, years</b> | 1.3[1.0-1.8]              | 5.3[2.1-9.5]           | 0.008   |
| <b>Biological withdrawal attempts, yes/no</b>       | 16/0                      | 20/0                   | n/a     |
| <b>DMARD</b>                                        |                           |                        | n/a     |
| - Methotrexate                                      | 10                        | 17                     |         |
| - Sulfasalazine                                     | 1                         |                        |         |
| <b>Other Rx</b>                                     |                           |                        |         |
| - Statin                                            | 0                         | 1                      | 0.364   |
| - Anti-hypertensive                                 | 4                         | 6                      | 0.739   |

*Values are n or mean ± SD. ESR; erythrocyte sedimentation rate, DAS28 indicates disease activity score based on 28 joints, CCP; cyclic citrulline peptide, DMARD; disease modifying antirheumatic drugs. \* P<0.05 vs no biological.*
